# Supplementary material
Source: MDPI journal article supplement (https://www.mdpi.com/2073-4344/12/10/1153)
Supplement: s1 [file s1]

## Supplementary Materials:

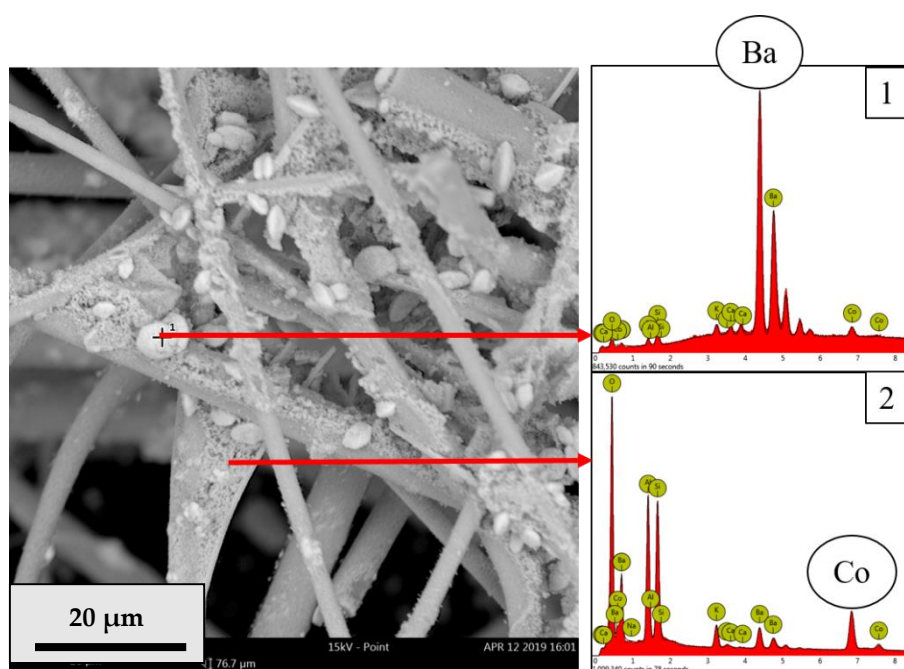

**Figure S1:** Identification of the deposits found for the sample  
Co,Ba,K(12)U-I by spot EDX analysis.

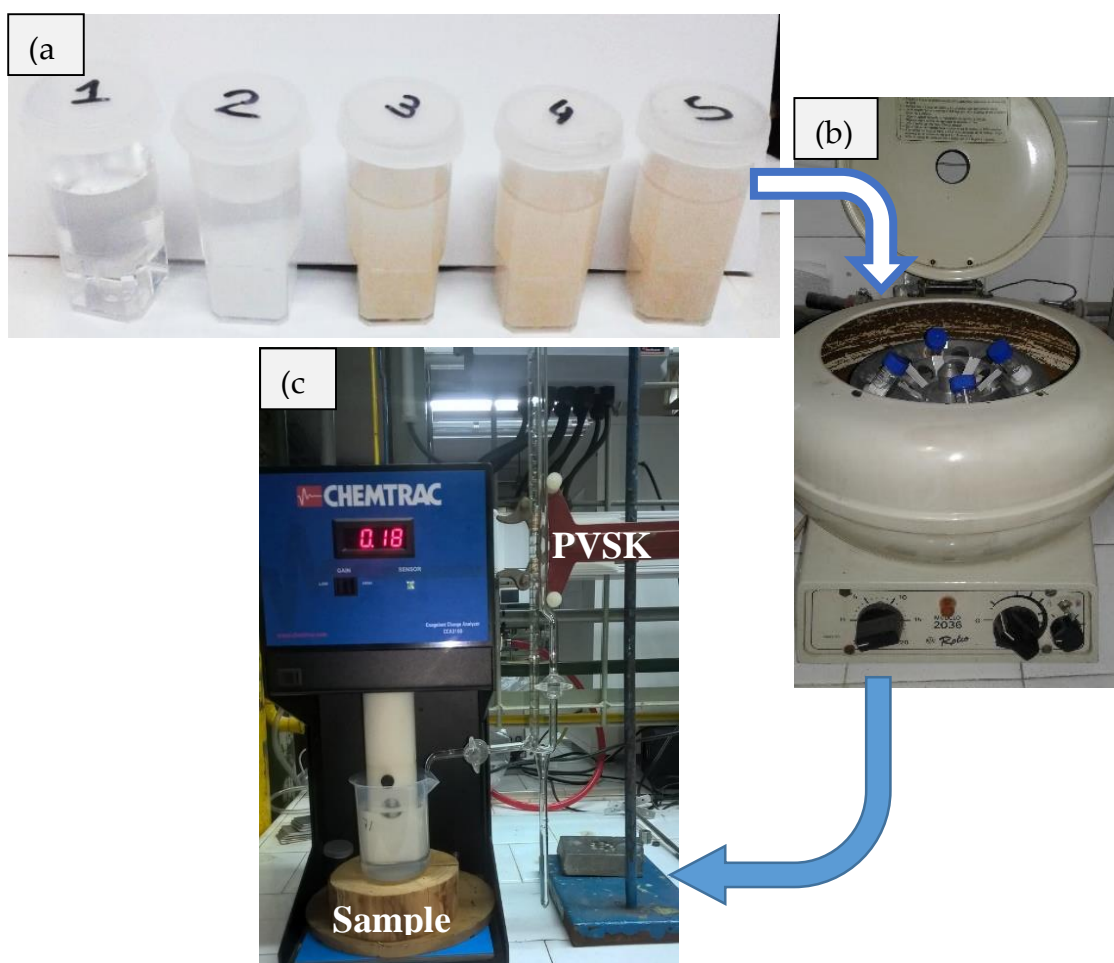

**Figure S2:** Stages of polyelectrolyte titration by charge-flow potential measurements: a) extracted samples (samples 1-5), b) centrifugation and c) potentiometric titration.
